# Supplementary material
Source: PubMed Central journal article supplement (PMC7642666)
Supplement: ajcr0010-3083-f4.pdf [file ajcr0010-3083-f4.pdf]

## The roles of PEA3 subfamily in cancer

**Table S1.** PEA3 subfamily regulates the expression of genes associated with cell migration and invasion

| Cancer type                 | PEA3 member | Gene                   | Finding                                                                                                                                                                   | Reference |
|-----------------------------|-------------|------------------------|---------------------------------------------------------------------------------------------------------------------------------------------------------------------------|-----------|
| Bladder cancer              | ETV4        | P3H4                   | ETV4 binds directly to the promoter region of P3H4 and activates its transcription, prompting cancer proliferation and invasion.                                          | [1]       |
| Bladder cancer              | ETV5        | TAZ                    | ETV5 is involved in cancer invasion and metastasis by upregulating TAZ expression and activating Hippo pathway.                                                           | [2]       |
| Breast cancer               | ETV1        | hTERT                  | HER2 interacts with ETV1 to synergistically activate hTERT transcription, conferring the aggressive biologic behavior in breast cancer.                                   | [3]       |
| Breast cancer               | ETV5        | hTERT                  | ETV5 and c-Myc synergistically mediate hTERT activation via composite Ets/E-box motifs.                                                                                   | [4]       |
| Breast cancer               | ETV1        | Rcl                    | ETV1 and HER2/Neu coordinate to upregulate the Rcl expression. ETV1 binds to the Rcl promoter and increases tumor grade.                                                  | [5]       |
| Breast cancer               | ETV1        | Smad7                  | HER2/Neu collaborates with ETV1 to activate Smad7 transcription.                                                                                                          | [6]       |
| Breast cancer               | ETV4        | MMP13                  | ETV4 promotes cancer proliferation, migration, invasion, and anchorage-independent growth by targeting its target gene MMP13.                                             | [7]       |
| Breast cancer (ER-negative) | ETV4        | MMP1, CXCR4            | ETV4 could promote cancer progression and metastasis by activating its well-characterized target genes CXCR4 and MMP1.                                                    | [8]       |
| Chondrosarcoma              | ETV5        | MMP2                   | ETV5 upregulates MMP2 expression and promotes chondrosarcoma metastasis.                                                                                                  | [9]       |
| ccRCC                       | ETV4        | FOSL1                  | ETV4 promotes ccRCC metastasis by activating the pro-metastatic gene FOSL1 in a PI3K-AKT dependent manner.                                                                | [10]      |
| Colorectal cancer           | ETV4        | MMP7, MMP14            | ETV4 acts as a mediator of cancer metastasis by regulating MMP7 and MMP14 expression.                                                                                     | [11]      |
| Colorectal cancer           | ETV4        | COX2, MMP7             | ETV4 activates transcriptional activity of COX-2 and MMP-7, leading to cancer progression.                                                                                | [12]      |
| Colorectal cancer           | ETV4        | MMP1, MMP7, COX2, iNOS | ETV4 expression is positively correlated with the expression of MMP1, MMP7, COX2, and iNOS, ETV4-MMP1-MMP-7-COX-2-iNOS axis contributes to colorectal cancer progression. | [13, 14]  |
| Colorectal cancer           | ETV5        | PDGF-BB                | ETV5 directly binds to the promoter region of PDGF-BB, which mediates colorectal cancer angiogenesis.                                                                     | [15]      |
| Endometrial cancer          | ETV4        | ER                     | ETV4 is a candidate factor regulating ER in endometrial cancer cells. The high level of ER contributes to cancer progression.                                             | [16]      |
| Endometrial cancer          | ETV5        | MMP2                   | ETV5 regulates MMP2 expression to confer tumor invasion ability.                                                                                                          | [17]      |
| Endometrial cancer          | ETV5        | NID1, NUPR1            | ETV5 promotes cancer migration and invasion by directly upregulating NID1 and NUPR1 transcriptional activity in vitro and in vivo.                                        | [18]      |
| Gastric cancer              | ETV4        | KDM5D*                 | ETV4 might promote gastric cancer cell metastasis by negatively modulating KDM5D.                                                                                         | [19]      |
| Gastric cancer              | ETV4        | KIF2A                  | ETV4 directly upregulates the expression of KIF2 to promote cell migration and invasion.                                                                                  | [20]      |

## The roles of PEA3 subfamily in cancer

|                                     |          |                  |                                                                                                                                                                                  |          |
|-------------------------------------|----------|------------------|----------------------------------------------------------------------------------------------------------------------------------------------------------------------------------|----------|
| Gastric cancer                      | ETV4     | ME1              | ETV4 directly binds to ME1 promoter to promote cancer metastasis.                                                                                                                | [21]     |
| Glioma                              | ETV4     | GalT V           | ETV4 physically interacts with Sp1 transcription factor and forms an ETV4/Sp1 complex, the ETV4/Sp1 complex binds to the GalT V promoter, inducing glioma invasion.              | [22]     |
| Hepatocellular carcinoma            | ETV4     | uPAR             | PBK promotes migration invasion by enhancing the binding of ETV4 to the uPAR promoter.                                                                                           | [23]     |
| Hepatocellular carcinoma            | ETV4     | MMP1             | CIC deficiency increases the expression of its downstream target ETV4, which further upregulates MMP1 expression and promotes hepatocellular carcinoma progression.              | [24]     |
| Lung adenocarcinoma                 | ETV4     | MSI2             | ETV4 increases MSI2 expression by directly binding to the promoter of MSI2, which promotes the proliferation and invasion of lung adenocarcinoma.                                | [25]     |
| Lung cancer                         | ETV1/4/5 | MMP2             | ETV1/ETV4/ETV5 overexpression upregulates MMP2 target gene, which leads to the migration and invasion of lung cancer cells.                                                      | [26]     |
| Lung cancer (NSCLC)                 | ETV4     | PXN, MMP1        | ETV4 overexpression promotes cancer progression by upregulating PXN and MMP1 transcriptionally.                                                                                  | [27]     |
| Lung cancer (NSCLC)                 | ETV4     | Rho              | ETV4 activates the Rho protein in an HGF-enhanced manner, which further increases the phosphorylation of MLC and induces the malignancy potential of NSCLC cells.                | [28]     |
| Melanoma                            | ETV4     | MMP25            | ETV4 induces MMP25 overexpression and leads to melanoma metastasis.                                                                                                              | [29]     |
| Neuroblastoma                       | ETV5     | RET              | ETV5 promotes RET gene transcription by binding to the RET promoter, which drives neuroblastoma oncogenesis.                                                                     | [30]     |
| Oesophageal adenocarcinoma          | ETV4     | MMP1             | ETV4 promotes cancer proliferation and invasive by targeting MMP1.                                                                                                               | [31]     |
| Oesophageal squamous cell carcinoma | ETV4     | MMP2, MMP9       | ETV4 induces cancer metastasis by enhancing MMP-2 and MMP-9 expression.                                                                                                          | [32]     |
| Oral squamous cell carcinoma        | ETV4     | MMP1/3/9         | HGF induces the expression of ETV4, which in turn activates MMP1/3/9 and leads to oral cancer cell invasion.                                                                     | [33]     |
| Ovarian cancer                      | ETV5     | FOXM1            | ETV5 upregulates FOXM1 expression by binding to the proximal promoter region of FOXM1, which promotes cancer progression.                                                        | [34]     |
| Pancreatic cancer                   | ETV1     | Sparc, Has2      | By regulating two novel downstream factors Sparc and Has2, ETV1 increases the invasive capacity of pancreatic cancer cells.                                                      | [35]     |
| Prostate cancer                     | ETV1     | $\beta$ -catenin | ETV1 could stabilize $\beta$ -catenin, which leads to the increased accumulation of $\beta$ -catenin within prostate cancer cells, promoting malignant transformation in cancer. | [36]     |
| Prostate cancer                     | ETV1     | MMP1, MMP7       | ETV1 activates transcription of its target genes MMP-1 and MMP-7, which regulates cell migration and invasion.                                                                   | [37, 38] |

## The roles of PEA3 subfamily in cancer

|                 |          |                 |                                                                                                                                                                                           |          |
|-----------------|----------|-----------------|-------------------------------------------------------------------------------------------------------------------------------------------------------------------------------------------|----------|
| Prostate cancer | ETV1     | CHK1*           | ETV1 contributes to DNA damage accumulation, genetic instability, and prostate tumor progression by directly repressing the expression of CHK1.                                           | [39]     |
| Prostate cancer | ETV4     | uPA, MMP2, MMP9 | ETV4 regulates uPA expression by directly binding to the uPA promoter region. Besides, uPA binds to its receptor uPAR, activating MMP2 and MMP9 expression and inducing tumor metastasis. | [40]     |
| Prostate cancer | ETV4     | MYC             | ETV4 directly binds to the 5' and 3' MYC enhancers and regulates MYC expression to increase cellular motility.                                                                            | [41]     |
| Prostate cancer | ETV4     | TAZ             | ETV4 directly binds to the TAZ promoter region. TAZ upregulates its target gene SH3BP1, which promotes cell migration and anchorage-independent growth.                                   | [42]     |
| Thyroid cancer  | ETV1/4/5 | TERT            | ETV5 directly binds to the TERT promoter in a mutation-dependent manner, which increases the invasiveness of thyroid carcinoma.                                                           | [43, 44] |
| Thyroid cancer  | ETV5     | PIK3A           | ETV5 promotes cell growth and migration by targeting and activating PIK3CA transcriptionally.                                                                                             | [45]     |

---

ER, estrogen receptor; MMP, matrix metalloproteinase; ccRCC, Clear cell renal cell carcinoma; PDGF-BB, platelet-derived growth factor BB; NID1, Nidogen 1; NUPR1, Nuclear Protein 1; MLC, myosin light chain; NSCLC, non-small-cell lung cancer; CHK1, Checkpoint kinase 1. \*Genes downregulated by PEA3 subfamily.

# The roles of PEA3 subfamily in cancer

## References

- [1] Hao L, Pang K, Pang H, Zhang J, Zhang Z, He H, Zhou R, Shi Z and Han C. Knockdown of P3H4 inhibits proliferation and invasion of bladder cancer. *Aging (Albany NY)* 2020; 12: 2156-2168.
- [2] di Martino E, Alder O, Hurst CD and Knowles MA. ETV5 links the FGFR3 and Hippo signalling pathways in bladder cancer. *Sci Rep* 2019; 9: 5740.
- [3] Vageli D, Ioannou MG and Koukoulis GK. Transcriptional activation of hTERT in breast carcinomas by the Her2-ER81-related pathway. *Oncol Res* 2009; 17: 413-423.
- [4] Zhang F, Wang S and Zhu J. ETS variant transcription factor 5 and c-Myc cooperate in derepressing the human telomerase gene promoter via composite ETS/E-box motifs. *J Biol Chem* 2020; 295: 10062-10075.
- [5] Shin S, Bosc DG, Ingle JN, Spelsberg TC and Janknecht R. Rcl is a novel ETV1/ER81 target gene upregulated in breast tumors. *J Cell Biochem* 2008; 105: 866-874.
- [6] Dowdy SC, Mariani A and Janknecht R. HER2/Neu- and TAK1-mediated up-regulation of the transforming growth factor beta inhibitor Smad7 via the ETS protein ER81. *J Biol Chem* 2003; 278: 44377-44384.
- [7] Dumortier M, Ladam F, Damour I, Vacher S, Bièche I, Marchand N, de Launoit Y, Tulasne D and Chotteau-Lelièvre A. ETV4 transcription factor and MMP13 metalloproteinase are interplaying actors of breast tumorigenesis. *Breast Cancer Res* 2018; 20: 73.
- [8] Kim HJ, Kim SH, Yu EJ, Seo WY and Kim JH. A positive role of DBC1 in PEA3-mediated progression of estrogen receptor-negative breast cancer. *Oncogene* 2015; 34: 4500-4508.
- [9] Power PF, Mak IW, Singh S, Popovic S, Gladly R and Ghert M. ETV5 as a regulator of matrix metalloproteinase 2 in human chondrosarcoma. *J Orthop Res* 2013; 31: 493-501.
- [10] Xu L, Hu H, Zheng LS, Wang MY, Mei Y, Peng LX, Qiang YY, Li CZ, Meng DF, Wang MD, Liu ZJ, Li XJ, Huang BJ and Qian CN. ETV4 is a theranostic target in clear cell renal cell carcinoma that promotes metastasis by activating the pro-metastatic gene FOSL1 in a PI3K-AKT dependent manner. *Cancer Lett* 2020; 482: 74-89.
- [11] Mesci A, Taeb S, Huang X, Jairath R, Sivaloganathan D and Liu SK. Pea3 expression promotes the invasive and metastatic potential of colorectal carcinoma. *World J Gastroenterol* 2014; 20: 17376-17387.
- [12] Boedefeld WM 2nd, Soong R, Weiss H, Diasio RB, Urist MM, Bland KI and Heslin MJ. E1A-F is overexpressed early in human colorectal neoplasia and associated with cyclooxygenase-2 and matrix metalloproteinase-7. *Mol Carcinog* 2005; 43: 13-17.
- [13] Nosho K, Yoshida M, Yamamoto H, Taniguchi H, Adachi Y, Mikami M, Hinoda Y and Imai K. Association of Ets-related transcriptional factor E1AF expression with overexpression of matrix metalloproteinases, COX-2 and iNOS in the early stage of colorectal carcinogenesis. *Carcinogenesis* 2005; 26: 892-899.
- [14] Horiuchi S, Yamamoto H, Min Y, Adachi Y, Itoh F and Imai K. Association of ets-related transcriptional factor E1AF expression with tumour progression and overexpression of MMP-1 and matrilysin in human colorectal cancer. *J Pathol* 2003; 200: 568-576.
- [15] Cheng X, Jin Z, Ji X, Shen X, Feng H, Morgenlander W, Ou B, Wu H, Gao H, Ye F, Zhang Y, Peng Y, Liang J, Jiang Y, Zhang T, Qiu W, Lu X and Zhao R. ETS variant 5 promotes colorectal cancer angiogenesis by targeting platelet-derived growth factor BB. *Int J Cancer* 2019; 145: 179-191.
- [16] Rodriguez AC, Vahrenkamp JM, Berrett KC, Clark KA, Guillen KP, Scherer SD, Yang CH, Welm BE, Janát-Amsbury MM, Graves BJ and Gertz J. ETV4 is necessary for estrogen signaling and growth in endometrial cancer cells. *Cancer Res* 2020; 80: 1234-1245.
- [17] Monge M, Colas E, Doll A, Gonzalez M, Gil-Moreno A, Planaguma J, Quiles M, Arbos MA, Garcia A, Castellvi J, Llauro M, Rigau M, Alazzouzi H, Xercavins J, Alameda F, Reventos J and Abal M. ERM/ETV5 up-regulation plays a role during myometrial infiltration through matrix metalloproteinase-2 activation in endometrial cancer. *Cancer Res* 2007; 67: 6753-6759.
- [18] Pedrola N, Devis L, Llauro M, Campoy I, Martinez-Garcia E, Garcia M, Muinelo-Romay L, Alonso-Alconada L, Abal M, Alameda F, Mancebo G, Carreras R, Castellví J, Cabrera S, Gil-Moreno A, Matias-Guiu X, Iovanna JL, Colas E, Reventós J and Ruiz A. Nidogen 1 and nuclear protein 1: novel targets of ETV5 transcription factor involved in endometrial cancer invasion. *Clin Exp Metastasis* 2015; 32: 467-478.
- [19] Cai LS, Chen QX, Fang SY, Lian MQ, Lian MJ and Cai MZ. ETV4 promotes the progression of gastric cancer through regulating KDM5D. *Eur Rev Med Pharmacol Sci* 2020; 24: 2442-2451.
- [20] Zhang X, Wang Y, Liu X, Zhao A, Yang Z, Kong F, Sun L, Yu Y and Jiang L. KIF2A promotes the progression via AKT signaling pathway and is upregulated by transcription factor ETV4 in human gastric cancer. *Biomed Pharmacother* 2020; 125: 109840.
- [21] Lu YX, Ju HQ, Liu ZX, Chen DL, Wang Y, Zhao Q, Wu QN, Zeng ZL, Qiu HB, Hu PS, Wang ZQ, Zhang DS, Wang F and Xu RH. ME1 regulates nadph homeostasis to promote gastric cancer growth and metastasis. *Cancer Res* 2018; 78: 1972-1985.
- [22] Jiang J, Wei Y, Shen J, Liu D, Chen X, Zhou J, Zong H, Yun X, Kong X, Zhang S, Yang Y and Gu J. Functional interaction of E1AF and Sp1 in glioma invasion. *Mol Cell Biol* 2007; 27: 8770-8782.

## The roles of PEA3 subfamily in cancer

- [23] Yang QX, Zhong S, He L, Jia XJ, Tang H, Cheng ST, Ren JH, Yu HB, Zhou L, Zhou HZ, Ren F, Hu ZW, Gong R, Huang AL and Chen J. PBK overexpression promotes metastasis of hepatocellular carcinoma via activating ETV4-uPAR signaling pathway. *Cancer Lett* 2019; 452: 90-102.
- [24] Kim E, Kim D, Lee JS, Yoe J, Park J, Kim CJ, Jeong D, Kim S and Lee Y. Capicua suppresses hepatocellular carcinoma progression by controlling the ETV4-MMP1 axis. *Hepatology* 2018; 67: 2287-2301.
- [25] Cheng T, Zhang Z, Cheng Y, Zhang J, Tang J, Tan Z, Liang Z, Chen T, Liu Z, Li J, Zhao J and Zhou R. ETV4 promotes proliferation and invasion of lung adenocarcinoma by transcriptionally upregulating MSI2. *Biochem Biophys Res Commun* 2019; 516: 278-284.
- [26] Kherrouche Z, Monte D, Werkmeister E, Stoven L, De Launoit Y, Cortot AB, Tulasne D and Chotteau-Lelievre A. PEA3 transcription factors are downstream effectors of Met signaling involved in migration and invasiveness of Met-addicted tumor cells. *Mol Oncol* 2015; 9: 1852-1867.
- [27] Wang Y, Ding X, Liu B, Li M, Chang Y, Shen H, Xie SM, Xing L and Li Y. ETV4 overexpression promotes progression of non-small cell lung cancer by upregulating PAXN and MMP1 transcriptionally. *Mol Carcinog* 2020; 59: 73-86.
- [28] Hakuma N, Kinoshita I, Shimizu Y, Yamazaki K, Yoshida K, Nishimura M and Dosaka-Akita H. E1AF/PEA3 activates the Rho/Rho-associated kinase pathway to increase the malignancy potential of non-small-cell lung cancer cells. *Cancer Res* 2005; 65: 10776-10782.
- [29] Chen Y, Sumardika IW, Tomonobu N, Winarsa Ruma IM, Kinoshita R, Kondo E, Inoue Y, Sato H, Yamauchi A, Murata H, Yamamoto KI, Tomida S, Shien K, Yamamoto H, Soh J, Liu M, Futami J, Sasai K, Katayama H, Kubo M, Putranto EW, Hibino T, Sun B, Nishibori M, Toyooka S and Sakaguchi M. Melanoma cell adhesion molecule is the driving force behind the dissemination of melanoma upon S100A8/A9 binding in the original skin lesion. *Cancer Lett* 2019; 452: 178-190.
- [30] Lopez-Delisle L, Pierre-Eugène C, Louis-Brennetot C, Surdez D, Raynal V, Baulande S, Boeva V, Grossetête-Lalami S, Combaret V, Peuchmaur M, Delattre O and Janoueix-Lerosey I. Activated ALK signals through the ERK-ETV5-RET pathway to drive neuroblastoma oncogenesis. *Oncogene* 2018; 37: 1417-1429.
- [31] Keld R, Guo B, Downey P, Gulmann C, Ang YS and Sharrocks AD. The ERK MAP kinase-PEA3/ETV4-MMP-1 axis is operative in oesophageal adenocarcinoma. *Mol Cancer* 2010; 9: 313.
- [32] Fung TM, Ng KY, Tong M, Chen JN, Chai S, Chan KT, Law S, Lee NP, Choi MY, Li B, Cheung AL, Tsao SW, Qin YR, Guan XY, Chan KW and Ma S. Neuropilin-2 promotes tumorigenicity and metastasis in oesophageal squamous cell carcinoma through ERK-MAPK-ETV4-MMP-E-cadherin deregulation. *J Pathol* 2016; 239: 309-319.
- [33] Hanzawa M, Shindoh M, Higashino F, Yasuda M, Inoue N, Hida K, Ono M, Kohgo T, Nakamura M, Notani K, Fukuda H, Totsuka Y, Yoshida K and Fujinaga K. Hepatocyte growth factor upregulates E1AF that induces oral squamous cell carcinoma cell invasion by activating matrix metalloproteinase genes. *Carcinogenesis* 2000; 21: 1079-1085.
- [34] Llaurodó M, Majem B, Castellví J, Cabrera S, Gil-Moreno A, Reventós J and Ruiz A. Analysis of gene expression regulated by the ETV5 transcription factor in OV90 ovarian cancer cells identifies FOXM1 overexpression in ovarian cancer. *Mol Cancer Res* 2012; 10: 914-924.
- [35] Heeg S, Das KK, Reichert M, Bakir B, Takano S, Caspers J, Aiello NM, Wu K, Neesse A, Maitra A, Iacobuzio-Donahue CA, Hicks P and Rustgi AK. ETS-transcription factor ETV1 regulates stromal expansion and metastasis in pancreatic cancer. *Gastroenterology* 2016; 151: 540-553, e514.
- [36] Morsalin S, Yang C, Fang J, Reddy S, Kayarthodi S, Childs E, Matthews R, Rao VN and Reddy ESP. Molecular mechanism of  $\beta$ -Catenin signaling pathway inactivation in ETV1-positive prostate cancers. *J Pharm Sci Pharmacol* 2015; 2: 208-216.
- [37] Oh S, Shin S, Lightfoot SA and Janknecht R. 14-3-3 proteins modulate the ETS transcription factor ETV1 in prostate cancer. *Cancer Res* 2013; 73: 5110-5119.
- [38] Shin S, Oh S, An S and Janknecht R. ETS variant 1 regulates matrix metalloproteinase-7 transcription in LN-CaP prostate cancer cells. *Oncol Rep* 2013; 29: 306-314.
- [39] Lunardi A, Varmeh S, Chen M, Taulli R, Guarnerio J, Ala U, Seitzer N, Ishikawa T, Carver BS, Hobbs RM, Quarantotti V, Ng C, Berger AH, Nardella C, Poliseno L, Montironi R, Castillo-Martin M, Cordon-Cardo C, Signoretti S and Pandolfi PP. Suppression of CHK1 by ETS family members promotes DNA damage response bypass and tumorigenesis. *Cancer Discov* 2015; 5: 550-563.
- [40] Qi M, Liu Z, Shen C, Wang L, Zeng J, Wang C, Li C, Fu W, Sun Y and Han B. Overexpression of ETV4 is associated with poor prognosis in prostate cancer: involvement of uPA/uPAR and MMPs. *Tumour Biol* 2015; 36: 3565-3572.
- [41] Hollenhorst PC, Paul L, Ferris MW and Graves BJ. The ETS gene ETV4 is required for anchorage-independent growth and a cell proliferation gene expression program in PC3 prostate cells. *Genes Cancer* 2011; 1: 1044-1052.
- [42] Liu CY, Yu T, Huang Y, Cui L and Hong W. ETS (E26 transformation-specific) up-regulation of the transcriptional co-activator TAZ promotes cell migration and metastasis in prostate cancer. *J Biol Chem* 2017; 292: 9420-9430.

## The roles of PEA3 subfamily in cancer

- [43] Song YS, Yoo SK, Kim HH, Jung G, Oh AR, Cha JY, Kim SJ, Cho SW, Lee KE, Seo JS and Park YJ. Interaction of BRAF-induced ETS factors with mutant TERT promoter in papillary thyroid cancer. *Endocr Relat Cancer* 2019; 26: 629-641.
- [44] Bullock M, Lim G, Zhu Y, Åberg H, Kurdyukov S and Clifton-Bligh R. ETS Factor ETV5 activates the mutant telomerase reverse transcriptase promoter in thyroid cancer. *Thyroid* 2019; 29: 1623-1633.
- [45] Meng D, Li Z, Ma X, Wu L, Fu L and Qin G. ETV5 overexpression contributes to tumor growth and progression of thyroid cancer through PIK3CA. *Life Sci* 2020; 253: 117693.

## The roles of PEA3 subfamily in cancer

**Table S2.** miRNAs and drugs targeting PEA3 subfamily

| Cancer type                     | PEA3 member | miRNA/drug                       | Patient samples                                                                              | In-vitro model                                       | Functions                                                                                                                                                   |
|---------------------------------|-------------|----------------------------------|----------------------------------------------------------------------------------------------|------------------------------------------------------|-------------------------------------------------------------------------------------------------------------------------------------------------------------|
| Prostate cancer                 | ETV1        | miR-129-5p                       | 30 tumor tissues and matched adjacent normal tissues                                         | RWPE-1, PC-3, DU145, and LNCaP                       | Through the repression of ETV1 expression, miR-129-5p could inactivate YAP signaling and inhibit cell proliferation.                                        |
| Lung adenocarcinoma             | ETV1        | miR-1224-3p                      | 52 tumor tissues and matched adjacent normal tissues                                         | HBE, HCC827, NCI-H23, SPC-A1, H1975, H1299, and A549 | Circ-ZNF609 enhances lung adenocarcinoma progression by increasing oncogenic ETV1 expression via sponging miR-1224-3p.                                      |
| Glioma                          | ETV1        | miR-195-5p                       | /                                                                                            | hCMEC/D3, HEK293T, U87, NHAs                         | miR-195-5p directly targets ETV1 3'-UTR and reduces its expression.                                                                                         |
| Lung cancer                     | ETV1        | miR-582-5p                       | Blood samples of 38 lung cancer and 23 healthy controls                                      | /                                                    | ETV1 is regulated by miR-582-5p in lung cancer.                                                                                                             |
| Triple-negative breast cancer   | ETV1        | miR-17-5p                        | 105 tumor tissues and matched adjacent normal tissues                                        | MCF 10A, MDA-MB-231, BT-549, Hs578 T                 | miR-17-5p suppresses cell proliferation and invasion by directly targeting ETV1.                                                                            |
| Gastrointestinal stromal tumors | ETV1        | miR-17/20a                       | 50 primary GIST tissues and 10 GI-LMS tissues                                                | GIST-T1, GIST-882                                    | Overexpression of miR-17 and miR-20a affects the cell cycle and induces apoptosis by targeting ETV1 in GIST cells.                                          |
| Glioblastoma                    | ETV5        | miR-8067                         | 3 tumor tissues and matched adjacent normal tissues                                          | /                                                    | Low expression of ETV5, regulated by miR-8067, is significantly associated with a good prognosis.                                                           |
| Melanoma                        | ETV1        | miR 17                           | /                                                                                            | WM-266-4, 624mel                                     | miR-17 enhances the migration of melanoma cells by downregulating its target gene ETV1.                                                                     |
| Prostate cancer                 | ETV1        | YK-4-279                         | /                                                                                            | LNCaP, PC3                                           | YK-4-279 inhibits ETV1 biological activity in fusion-positive prostate cancer cells, leading to decreased motility and invasion.                            |
| Melanoma and prostate cancer    | ETV1        | BRD32048                         | /                                                                                            | 501mel, SK-MEL-28, LNCaP, PC3                        | BRD32048 binds to ETV1 directly, modulating the transcriptional activity of ETV1.                                                                           |
| Breast cancer                   | ETV4, ETV5  | Tamoxifen                        | 69 women at increased risk for breast cancer (37 received tamoxifen and 32 received placebo) | /                                                    | Tamoxifen significantly downregulates the expression of ETV4 and ETV5, which are known to play a central role in stem cell renewal and differentiation.     |
| Gastrointestinal stromal tumors | ETV1        | trifluoperazine and thioridazine | /                                                                                            | GIST882                                              | Trifluoperazine and thioridazine are potential ETV1 targeting drugs. Combined of phenothiazine and MEK inhibitors exerts strong anticancer effect in GISTs. |
| Cervical carcinoma              | ETV1        | p-anisidine                      | /                                                                                            | HeLa                                                 | p-anisidine is a promising anticancer agent targeting ETV1 with an IC50 of 27.769 mg/mL in HeLa cells.                                                      |

GIST, gastrointestinal stromal tumors; GI-LMS, gastrointestinal leiomyosarcomas.
